# Supplementary material
Source: publisher figshare collection journal article supplement (https://acs.figshare.com/ndownloader/files/4705213)
Supplement: Supplementary file 1 [file 4705213]

## **Supporting Information**

### **Discovery of 3-piperidinyl-1-cyclopentanecarboxamide as a Novel Scaffold for Highly Potent CCR2 Receptor Antagonists**

Lihu Yang, Gabor Butora, Richard X. Jiao, Alex Pasternak, Changyou Zhou, William H. Parsons, Sander G. Mills, Pasquale P. Vicario, Julia M. Ayala, Margaret A. Cascieri, Malcolm MacCoss

#### Table of contents

|                                                |    |
|------------------------------------------------|----|
| Title Page                                     | S1 |
| Experimental: Biological Assays                | S2 |
| a). Preparation of human monocyte              |    |
| b). Human monocyte cell binding assay          |    |
| c). Human monocyte chemotaxis functional assay |    |
| Experimental: Chemistry                        | S3 |
| Compound Purity/HPLC/HRMS Data                 | S5 |

## EXPERIMENTALS: BIOLOGICAL ASSAYS

a) Preparation of Human Monocytes: Plasma enriched for human leukocytes is obtained by leukapheresis of human blood (Biological Specialty Corporation.) The leukocyte-rich plasma is diluted 1:2 with saline and underlayered with 10 ml of Lymphocyte Separation Media (LSM) (ICN, Aurora, Ohio), and centrifuged at 700 X g for 30 minutes at room temperature. The top layer is aspirated, the mononuclear layer is aliquoted in 4 50ml conical tubes and the cells washed 2X with PBS. Following centrifugation (200 X g, 5 minutes), 5 ml RPMI is added along with sheep red blood cells (4 ml) and the tubes are incubated for 15 minutes at 37°C (mix every 5 minutes). Centrifuge the cells (225 X g, 5 minutes), aspirate the supernatant, and incubate the cell pellets at -200°C for 6 minutes and then 40°C for 15 minutes. Gently resuspend each pellet in 25 ml PBS and underlay with 10 ml LSM. Centrifuge at 600 X g for 15 minutes. Aspirate the top layer to waste and collect the mononuclear cell layer interface. Wash with PBS and centrifuge. Resuspend the pellet in 5 ml ACK lysis buffer for 5 minutes. Centrifuge (225 X g, 5 minutes) and resuspend cells in 40 ml RPMI/10% FCS. Count the cells and store at 40°C.

b) human monocyte binding assay: Human monocytes ( $2 \times 10^5$ ) expressing human CCR2 receptor, CHO cells ( $5 \times 10^4$ ) expressing CCR2B I40L receptor, or L1.2 cells expressing CCR2A I40L ( $5 \times 10^4$ ) or CCR2B I40L/V64I ( $5 \times 10^4$ ) were incubated with  $^{125}$ I-hMCP-1 (20-25 pM, 2200 Ci/mmol; Dupont/New England Nuclear) at room temperature for 45 minutes in buffer containing HEPES (50 mM),  $\text{MgCl}_2$  (5 mM) and  $\text{CaCl}_2$  (1 mM), pH 7.4, 0.5% BSA and protease inhibitor cocktail. For experiments in the presence of serum,  $4 \times 10^5$  human monocytes were used and human serum was added to a final concentration of 15% in the reaction mixture. The reactions were terminated and the separation of bound from free ligand accomplished by filtration over GF/B filters that had been presoaked in 0.10% polyethylenimine using a Packard Cell Harvester. In all cases non-specific binding was determined by the addition of excess (100nM) of unlabeled MCP-1. The filters were washed with 25 mM HEPES, pH 7.5 containing 500 mM NaCl and the plates dried. The plates were counted for  $^{125}$ I radioactivity using Microscint 0 (Packard) and a Topcount NXT (Packard).

c) human monocyte chemotaxis functional assay: Chemotaxis Assay: Assays were performed in 96 well disposable chemotaxis plates (ChemoTx, NeuroProbe, Inc.) with a 5 mm pore size (5.7 mm diameter). Monocytes ( $1 \times 10^7$  cells/ml) were incubated with 2 mM Calcein-AM (Molecular Probes) in Hanks Balanced Salt Solution containing 0.01% BSA at 37°C for 30 minutes. The dye-loaded cells were washed and resuspended at  $6 \times 10^6$  cells/ml in RPMI 1640 (lacking phenol red) containing 0.01% BSA. Assay was performed with  $1.5 \times 10^5$  cells/well. Known CCR2 antagonist 1-(3,4-dichlorobenzyl)-5-hydroxy-1H-indole-2-carboxylic acid was calculated to have an  $\text{IC}_{50}$  of 95 nM in this assay, in good agreement with the reported value of 60 nM (Faull, A. W.; Kettle, J. G. WO 2000046196, 2000).

**Ethyl 3-methylenecyclopentane carboxylate (14a).** A solution of 2-[(trimethylsilyl)methyl]-2-propen-1-yl acetate (9.64 mL, 45.36 mmol), ethyl acrylate (5.18 g 45.36 mmol), palladium acetate (510 mg, 2.268 mmol) in 50 mL of tetrahydrofuran was thoroughly degassed (vacuum/nitrogen cycle) and triisopropyl phosphite (2.80 mL, 11.34 mmol) was added via syringe. The pale yellow solution was stirred under reflux overnight. The solvent was concentrated in vacuo (80 torr), the residue diluted with water (50 mL) and extracted with diethyl ether (3 x 50 mL). The combined organic extracts were washed with water (2 x 30 mL), brine (1 x 30 mL), dried (anh. sodium sulfate) and the solvent was removed on rotavap (80 torr). The crude product was distilled under reduced pressure to yield 3.96 g (52 %) of pure product.

B.P.: 90 - 96 °C (20 torr). <sup>1</sup>H NMR (500 MHz, CDCl<sub>3</sub>): 4.89 (m, 2H), 4.16 (q, 7.0 Hz, 2H), 2.82 (bd, 15.8 Hz, 1H), 2.41 (m, 2H), 2.20 (m, 3H), 1.25 (s, 3H), 1.26 (q, 7 Hz, 3H).

**3-Methylenecyclopentane carboxylic acid (14b).** A solution of ethyl 3-methylenecyclopentane carboxylate (**14a**, 1.689 g, 10 mmol) in THF (6 mL) and water (6 mL) containing 412 mg (20 mmol) of lithium hydroxide monohydrate was homogenized with methanol and stirred at gentle reflux for 30 minutes. The solvent was evaporated to dryness; the residue was dissolved in water, extracted with diethyl ether (3 x 30 mL).

The pH was set acidic with 2N HCl, and the desired product was extracted with diethyl ether. The combined organic phases were dried with anhydrous magnesium sulfate, and the solvent was evaporated in vacuo to leave 600 mg (43 %) of the crude acid. Its relatively high volatility made further attempts at purification impractical, and the acid was used in the subsequent reaction step as obtained.

**3,5-Bis(trifluoromethyl)benzyl 3-methylene-1-methylcyclopentane-carboxamide (15).** A solution of 3-methylene-1-methylcyclopentanecarboxylic acid, (**14b**, 600 mg, 4.28 mmol) 3,5-bis(trifluoromethyl)benzylamine hydrochloride (1.196 g, 4.28 mmol), 1-hydroxy-7-azabenzotriazole (583 mg, 4.28 mmol) and diisopropylethylamine (745 µL, 4.28 mmol) and 1-[3-(dimethylamino)propyl]-3-ethylcarbodiimide hydrochloride (EDC, 1.230 g, 0.168, 6.42 mmol) in dichloromethane (10 mL) was stirred at room temperature for 1 hr. The reaction mixture was diluted with dichloromethane (40 mL) and washed with water (3 x 30 mL), brine (1 x 30 mL), dried (anhydrous sodium sulfate) and the solvent was evaporated under reduced pressure. The crude product was purified *via* mplc (Lobar Fertigsäule, LiChroprep, 40-63 µm, ethyl acetate/hexanes (1:4)) yielding 777.6 mg (49 %) of pure product. <sup>1</sup>H NMR (500 MHz, CDCl<sub>3</sub>) 7.79 (s, 1H), 7.70 (s, 2H), 6.19 (bs, 1H), 4.98 (bs, 1H), 4.92 (bs, 1H), 4.62 (dd, 15.6 Hz, 6.2 Hz, 1H), 4.54 (dd, 15.8 Hz, 6.0 Hz, 1H), 2.78 (bd, 15.8 Hz, 1H), 2.46 (m, 2H), 2.30 (bd, 15.8 Hz, 1H), 2.18 (m, 1H), 1.70 (m, 1H), 1.31 (s, 3H).

***N*-[3,5-bis(trifluoromethyl)benzyl]-1-methyl-3-[(1*R*,3'*R*)-3'-methyl-1'*H*-spiro[indene-1,4'-piperidin]-1'-yl]cyclopentanecarboxamide (16).** A solution of the olefin 3,5-bis(trifluoromethyl)benzyl 3-methylene-1-methylcyclopentane-carboxamide (15, 255 mg, 0.698 mmol) in dichloromethane (20 mL) was ozonized at  $-78\text{ }^{\circ}\text{C}$ . The excess ozone was removed with a stream of nitrogen. Intermediate 1 (165 mg, 0.698 mmol), diisopropyl-ethylamine (121  $\mu\text{L}$ , 0.698 mmol) and 400 mg of molecular sieves (4A, crushed) were added, followed by sodium triacetoxyborohydride (444 mg, 2.094 mmol). The reaction mixture was stirred at room temperature for 48 hrs after which it was diluted with dichloromethane (50 mL). The sieves were filtered off (Celite), the filtrate was washed with a saturated solution of sodium bicarbonate (1 x 50 mL), water (2 x 50 mL) and brine (1 x 50 mL). After drying (anhydrous sodium sulfate), the solvent was evaporated under reduced pressure, and the residue (216 mg) was further purified by preparative thin layer chromatography (Analtech, Silica Gel GF, 1000  $\mu$ , 100 % ethyl acetate) to yield 68 mg (18 %) of the higher eluting (1,3-*cis*-cyclopentane) diastereoisomeric pair and 92 mg (24 %) of the lower eluting *trans*-diastereoisomeric pair. The higher eluting diastereoisomeric pair was separated into single enantiomers using Diacel's Chiralcel OD chiral preparative HPLC column, eluent hexane : ethanol (97 : 3) at flowrate of 9 mL/min. The retention times of the individual isomers (analytical 250 x 4.6 mm column, 1.0 mL/min) were 6.93 min (40 %), 7.91 (45 %), 9.63 (9 %) and 12.04 (4 %).  $^1\text{H}$  NMR (500 MHz,  $\text{CDCl}_3$ ) 9.22 (bs, 1H), 7.82 (bs, 2H), 7.78 (bs, 1H), 7.27 (m, 1H), 7.24 (dt, 7.3 Hz, 0.7 Hz, 1H), 7.14 (t, 7.3 Hz, 1H), 6.80 (m, 2H), 6.60 (d, 5.7 Hz, 1H), 4.68 (m, 2H), 3.15 (bd, 11.4 Hz, 1H), 3.02 (bd, 10.5 Hz, 1H), 2.93 (bs, 1H), 2.35 (bd, 14 Hz, 1H), 2.20 (m, 2H), 1.7-2.1 (m, 9), 1.37 (s, 3H), 1.32 (bdt, 13.7 Hz, 2.5 Hz, 2H).  $^{13}\text{C}$  NMR (125 MHz,  $\text{CDCl}_3$ ) 177.0, 148.4, 142.8, 142.1, 134.4, 133.9, 127.9, 127.7, 126.4, 121.6, 116.5, 115.3, 67.8, 56.4, 54.2, 51.8, 48.3, 42.7, 39.4, 37.5, 34.8, 32.1, 28.4, 25.8, 12.4. ESI-MS.: for  $\text{C}_{30}\text{H}_{32}\text{F}_6\text{N}_2\text{O}$ : calculated 550.24; found: 551.40 (M+H). HiRes MS: for  $\text{C}_{30}\text{H}_{32}\text{F}_6\text{N}_2\text{O}$ : calculated 551.24916 [M+H] $^{+}$ , found 551.24774.

Compound purities were determined by two diverse HPLC conditions.

HPLC conditions A: Waters XBridge C18, 150 x 4.6mm, 5  $\mu$ m Eluents: A = 10 mM ammonium formate in water, B = acetonitrile, flow 1.5 mL/min, oven temperature 40 C, diode-array detector (monitored at 260 nm) and a Shimadzu EV1020 MS detector. Time program: 0.00 min (2%B), 2.00 min (65%B), 10.00 min (95%B). Tr = 5.42 min (100%).

HPLC conditions B: Column: Waters Sunfire C18, 150 x 4.6mm, 5  $\mu$ m. Eluents: A = 0.1 % formic acid in water, B = 0.1 % formic acid in acetonitrile, flow 1.5 mL/min, oven temperature 40 C, diode-array detector (monitored at 260 nm). Time program: 0.00 min (2%B), 2.00 min (65%B), 10.00 min (95%B).

HPLC and HRMS data:

| Compd        | HPLC data |        |        | MF                                                              | HRMS (M+H) |           |
|--------------|-----------|--------|--------|-----------------------------------------------------------------|------------|-----------|
|              | Rt (min)  | % area | method |                                                                 | Calculated | Found     |
| <b>10a-2</b> | 4.25      | 98     | A      | C <sub>26</sub> H <sub>28</sub> F <sub>6</sub> N <sub>2</sub> O | 499.21631  | 499.21631 |
|              | 2.52      | 100    | B      |                                                                 |            |           |
| <b>12</b>    | 4.97      | 98     | A      | C <sub>29</sub> H <sub>30</sub> F <sub>6</sub> N <sub>2</sub> O | 537.23157  | 537.23175 |
|              | 4.51      | 93     | B      |                                                                 |            |           |
| <b>16</b>    | 5.33      | 99     | A      | C <sub>30</sub> H <sub>32</sub> F <sub>6</sub> N <sub>2</sub> O | 551.24916  | 551.24774 |
|              | 4.57      | 95     | B      |                                                                 |            |           |
| <b>18</b>    | 4.76      | 97     | A      | C <sub>29</sub> H <sub>30</sub> F <sub>6</sub> N <sub>2</sub> O | 537.23351  | 537.23187 |
|              | 3.04      | 93     | B      |                                                                 |            |           |
